# Supplementary material
Source: PubMed Central journal article supplement (PMC2776298)
Supplement: mmc1.pdf [file mmc1.pdf]

Biophysical Journal, Volume 97

**Supporting Material**

**PULMONARY SURFACTANT PROTEIN SP-C COUNTERACTS THE  
DELETERIOUS EFFECTS OF CHOLESTEROL ON THE ACTIVITY OF  
SURFACTANT FILMS UNDER PHYSIOLOGICALLY RELEVANT  
COMPRESSION-EXPANSION DYNAMICS**

Leticia Gomez-Gil, David Schurch, Erik Goormaghtigh, and Jesus Perez-Gil

**Supplementary Table 1.**

Thermodynamic parameters of the main calorimetric transition of DPPC bilayers in the absence or presence of cholesterol and SP-C

|                          | <b>Cholesterol<br/>(% w/w)</b> | <b><math>\Delta H</math> (Kcal/mol)</b> | <b><math>T_m</math> (°C)</b> |
|--------------------------|--------------------------------|-----------------------------------------|------------------------------|
| <b>DPPC</b>              | -                              | $7.1 \pm 0.06$                          | 41.4                         |
|                          | 3                              | $6.5 \pm 0.13$                          | 40.7                         |
|                          | 5                              | $3.9 \pm 0.13$                          | 43.7                         |
|                          | 10                             | $2.1 \pm 0.05$                          | 40.3                         |
|                          | 20                             | $0.56 \pm 0.15$                         | 41.4                         |
| <b>DPPC/SP-C 2% w/w</b>  | -                              | $6.4 \pm 0.5$                           | 40.2                         |
|                          | 3                              | $5.1 \pm 0.09$                          | 39.1                         |
|                          | 5                              | $3.9 \pm 0.36$                          | 39.8                         |
|                          | 10                             | $2.02 \pm 0.6$                          | 41.3                         |
|                          | 20                             | $0.89 \pm 0.1$                          | 41                           |
| <b>DPPC/SP-C 10% w/w</b> | -                              | $4.1 \pm 0.05$                          | 41.2                         |
|                          | 3                              | $3.2 \pm 0.03$                          | 41.5                         |
|                          | 5                              | $2.8 \pm 0.6$                           | 41.6                         |
|                          | 10                             | $2.5 \pm 0.7$                           | 41.0                         |
|                          | 20                             | $0.6 \pm 0.3$                           | 41.0                         |

**Supplementary Table 2.**

Thermodynamic parameters of the main calorimetric transition of DPPC:POPC:POPG bilayers in the absence or presence of cholesterol and SP-C.

|                               | <b>Cholesterol<br/>(% w/w)</b> | <b><math>\Delta H</math> (Kcal/mol)</b> | <b><math>T_m</math> (<math>^{\circ}C</math>)</b> | <b><math>\Delta T_{1/2}</math> (<math>^{\circ}C</math>)</b> |
|-------------------------------|--------------------------------|-----------------------------------------|--------------------------------------------------|-------------------------------------------------------------|
| <b>DPPC:POPC:POPG</b>         | -                              | $3614 \pm 12$                           | $29 \pm 0.2$                                     | $7.3 \pm 0.05$                                              |
|                               | 2                              | $2310 \pm 180$                          | $22 \pm 0.1^*$ , $29.6 \pm 0.04$                 | $7 \pm 0.2$                                                 |
|                               | 5                              | $1700 \pm 42$                           | $28 \pm 0.1$                                     | $10 \pm 0.1$                                                |
| <b>DPPC:POPC:POPG:SP-C 2%</b> | -                              | $2742 \pm 140$                          | $27.6 \pm 0.06$                                  | $6 \pm 0.2$                                                 |
|                               | 2                              | $2172 \pm 105$                          | $31 \pm 0.06$                                    | $8 \pm 0.2$                                                 |
|                               | 5                              | $1526 \pm 85$                           | $27.5 \pm 0.07$                                  | $10 \pm 0.2$                                                |

\*  $T_m$  for the first lipid transition observed in the thermogram.

**Supplementary Table 3.**

**Parameters defining the surface behaviour of DPPC/POPC/POPG films, in the absence or presence of variable amounts of cholesterol and surfactant proteins SP-B, SP-C or an N-terminal synthetic SP-C peptide, upon quasi-static or dynamic compression-expansion cycling in the captive bubble surfactometer**

|                          | Cholesterol<br>(% w/w) | Q-Stat, cycle 4     |                     |               | Dynamic, cycle 20   |                     |               |
|--------------------------|------------------------|---------------------|---------------------|---------------|---------------------|---------------------|---------------|
|                          |                        | $\nu_{\min}$ (mN/m) | $\nu_{\max}$ (mN/m) | %compression* | $\nu_{\min}$ (mN/m) | $\nu_{\max}$ (mN/m) | %compression* |
| 1% SP-C                  | -                      | 16 ± 0.5            | 67 ± 1.4            | 80 ± 0.9      | 7 ± 0.4             | 72 ± 0.7            | 70 ± 2.1      |
|                          | 5                      | 20 ± 1.2            | 61 ± 0.8            | 71 ± 1        | 20 ± 0.8            | 75 ± 1.4            | 64 ± 1.6      |
|                          | 10                     | 21 ± 2              | 35 ± 1.1            | 71 ± 1.3      | 6 ± 0.7             | 73 ± 0.6            | 57 ± 2        |
| 2% SP-C                  | -                      | 2 ± 0.3             | 57 ± 2.3            | 54 ± 0.4      | 3 ± 0.4             | 69 ± 0.9            | 58 ± 0.7      |
|                          | 5                      | 9 ± 0.6             | 58 ± 1              | 60 ± 0.5      | 7 ± 0.5             | 66 ± 1              | 62 ± 0.9      |
|                          | 10                     | 18 ± 1.3            | 61 ± 1.4            | 78 ± 1.1      | 4 ± 0.8             | 68 ± 2              | 74 ± 1.4      |
| 1% SP-B                  | -                      | 2 ± 0.2             | 25 ± 0.7            | 22 ± 0.8      | 2 ± 0.3             | 34 ± 1              | 18 ± 0.7      |
|                          | 5                      | 8 ± 0.4             | 64 ± 0.5            | 58 ± 0.9      | 8 ± 0.6             | 72 ± 0.8            | 51 ± 0.6      |
| 1% SP-B + 2% SP-C        | 5                      | 3 ± 0.2             | 31 ± 0.4            | 28 ± 0.5      | 3 ± 0.3             | 42 ± 0.7            | 23 ± 0.4      |
| 2.5 mol Nt SPC + 1% SP-B | 5                      | 22 ± 1.8            | 71 ± 1.3            | 73 ± 1.2      | 16 ± 1.1            | 73 ± 2              | 79 ± 0.8      |

\*% compression required to for the bubble to reach  $\nu_{\min}$

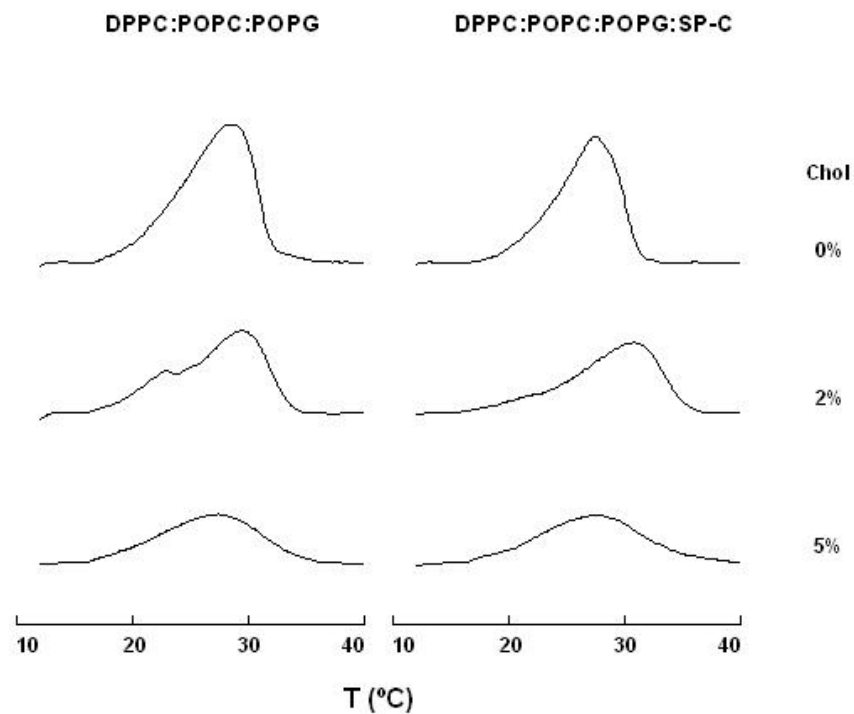

**Figure S1.**

**Thermotropic behaviour of DPPC:POPC:POPG bilayers in the presence of Cholesterol and SP-C.** Differential Scanning Calorimetry thermograms of DPPC:POPC:POPG multilamellar suspensions have been obtained in the absence (left) or in the presence (right) of 2% protein-to-phospholipid by weight of porcine SP-C, containing the indicated proportions of cholesterol (w/w with respect to phospholipid).

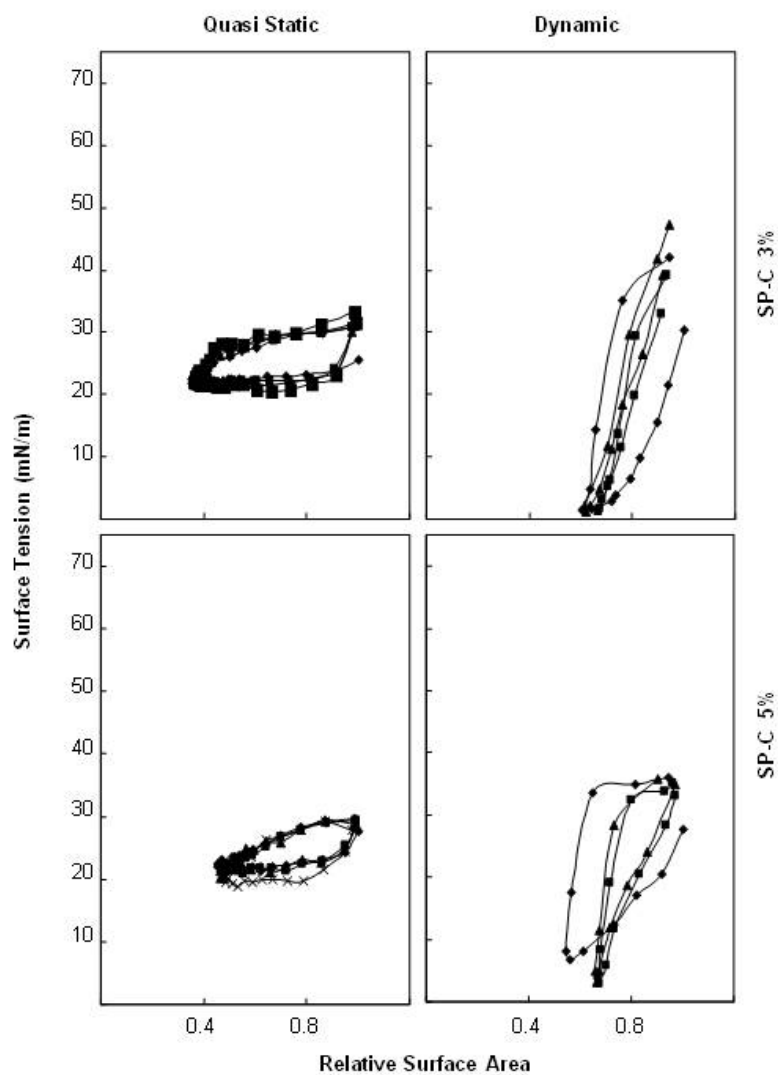

**Figure S2**  
 Quasi-static (left panels) and dynamic (right panels) compression-expansion isotherms of DPPC/POPC/POPG (50:25:15, w/w/w) films in the presence of 5% cholesterol to phospholipid ratio by weight and 3% (upper panels) or 5% (lower panels) SP-C (protein to lipid, w/w). Quasi-static cycles 1<sup>st</sup> (◆), 2<sup>nd</sup> (■), 3<sup>rd</sup> (▲) and 4<sup>th</sup> (X) and dynamic cycles 1<sup>st</sup> (◆), 10<sup>th</sup> (■) and 20<sup>th</sup> (▲) are represented.
